# Supplementary material for: Agreement between parent and child report on parental practices regarding dietary, physical activity and sedentary behaviours: the ENERGY cross-sectional survey
Source: PubMed Central journal article supplement (PMC4169834; doi:10.1186/1471-2458-14-918), 2014-09-05
Supplement: 12889_2013_7052_MOESM2_ESM.pdf [file 12889_2013_7052_MOESM2_ESM.pdf]

**Supplemental table 1: Overview of parental practices used in the child and parent ENERGY questionnaire and their assessed reliability and construct validity**

| Child questionnaire                                                           | Values                                                                                               | Reliability |    | Validity |    | Parental questionnaire                                                                 | Values                                                                  | Reliability |    | Validity |    |
|-------------------------------------------------------------------------------|------------------------------------------------------------------------------------------------------|-------------|----|----------|----|----------------------------------------------------------------------------------------|-------------------------------------------------------------------------|-------------|----|----------|----|
|                                                                               |                                                                                                      | ICC         | %* | ICC      | %† |                                                                                        |                                                                         | ICC         | %* | ICC      | %† |
| <i>Soft drink consumption</i>                                                 |                                                                                                      |             |    |          |    |                                                                                        |                                                                         |             |    |          |    |
| If I ask my parents/ care givers for a fizzy drink of fruit squash, I get one | Always<br>Often<br>Sometimes<br>Not often<br>Never                                                   | .62         | 54 | .54      | 44 | If my child asks for soft drinks, I will give it to him/her                            | Always<br>Often<br>Sometimes<br>Not often<br>Never                      | .79         | 75 | .43      | 61 |
| I am allowed to take fizzy drinks or fruit squash whenever I want             | Always<br>Often<br>Sometimes<br>Not often<br>Never                                                   | .68         | 52 | .30      | 43 | My child is allowed to take soft drinks whenever (s)he wants                           | Always<br>Often<br>Sometimes<br>Not often<br>Never                      | .83         | 73 | .64      | 59 |
| Are there usually fizzy drinks or fruit squash at your home?                  | Always<br>Often<br>Sometimes<br>Not often<br>Never                                                   | .74         | 61 | .52      | 46 | There are soft drinks available at home for my child                                   | Always<br>Often<br>Sometimes<br>Not often<br>Never                      | .85         | 73 | .67      | 65 |
| <i>Fruit juice consumption</i>                                                |                                                                                                      |             |    |          |    |                                                                                        |                                                                         |             |    |          |    |
| I am allowed to take fruit juices whenever I want                             | Always<br>Often<br>Sometimes<br>Not often<br>Never                                                   | .67         | 59 | .48      | 53 | My child is allowed to take fruit juices whenever (s)he wants                          | Always<br>Often<br>Sometimes<br>Not often<br>Never                      | .78         | 67 | .59      | 48 |
| Are there usually fruit juices in your home?                                  | Always<br>Often<br>Sometimes<br>Not often<br>Never                                                   | .67         | 59 | .57      | 52 | There are fruit juices available at home for my child                                  | Always<br>Often<br>Sometimes<br>Not often<br>Never                      | .86         | 75 | .63      | 61 |
| <i>Having breakfast</i>                                                       |                                                                                                      |             |    |          |    |                                                                                        |                                                                         |             |    |          |    |
| My parents/ care givers encourage me to have breakfast/                       | I fully agree<br>I agree a bit<br>Neither agree nor disagree<br>I disagree a bit<br>I fully disagree | .65         | 59 | .40      | 54 | I encourage my child to have breakfast                                                 | Always<br>Often<br>Sometimes<br>Not often<br>Never                      | .62         | 80 | .37      | 43 |
| Are there usually breakfast products (e.g. milk, cereal, bread) at your home? | Always<br>Often<br>Sometimes<br>Not often<br>Never                                                   | .42         | 75 | .25      | 80 | There are breakfast products (e.g. milk, cereal, bread) available at home for my child | Always<br>Often<br>Sometimes<br>Not often<br>Never                      | .68         | 95 | .28      | 98 |
| How often do you eat breakfast with your parents/care givers?                 | Never<br>Less than once a week<br>Once a week<br>2-4 days a week<br>5-6 days a week<br>Every day     | .74         | 51 | .66      | 41 | How often do you and/or your spouse/partner have breakfast together with your child?   | Never<br>Once a week<br>2-4 days a week<br>5-6 days a week<br>Every day | .79         | 65 | .80      | 71 |
| <i>Physical activity/ sports</i>                                              |                                                                                                      |             |    |          |    |                                                                                        |                                                                         |             |    |          |    |
| My parents/ care givers encourage me to be physically active/ do sports       | I fully agree<br>I agree a bit<br>Neither agree nor disagree<br>I disagree a bit<br>I fully disagree | .65         | 62 | .37      | 52 | I encourage my child to take part in physical activity/sports                          | Always<br>Often<br>Sometimes<br>Not often<br>Never                      | .80         | 78 | .30      | 54 |

|                                                                                             |                                                                                                                                                |     |    |     |    |                                                                                                                                                                                    |                                                                                                  |     |    |     |    |
|---------------------------------------------------------------------------------------------|------------------------------------------------------------------------------------------------------------------------------------------------|-----|----|-----|----|------------------------------------------------------------------------------------------------------------------------------------------------------------------------------------|--------------------------------------------------------------------------------------------------|-----|----|-----|----|
| How often do you take part in physical activity/ do sports with your parents/care givers?   | Never<br>Less than once a week<br>Once a week<br>2-4 days a week<br>5-6 days a week<br>† Every day                                             | .47 | 47 | .24 | 51 | How often do you and/ or your spouse/ partner participate in physical activity/ sports together with your child (e.g. play games outside, ride bikes, walk, play sports together)? | Never<br>Less than once a week<br>Once a week<br>2-4 days a week<br>5-6 days a week<br>Every day | .80 | 73 | .56 | 57 |
| <i>Watching TV</i><br>My parents/ care givers allow me to watch television whenever I want/ | I fully agree<br>I agree a bit<br>Neither agree nor disagree<br>I disagree a bit<br>I fully disagree                                           | .68 | 51 | .35 | 33 | My child is allowed to watch TV/video/dvd whenever (s)he wants                                                                                                                     | Always<br>Often<br>Sometimes<br>Not often<br>Never                                               | .72 | 61 | .55 | 43 |
| If I ask my parents/ care givers to watch television, I can do so                           | Always<br>Often<br>Sometimes<br>Not often<br>Never                                                                                             | .63 | 61 | .39 | 57 | If my child asks if (s)he is allowed to watch TV/video/dvd, I will allow it                                                                                                        | Always<br>Often<br>Sometimes<br>Not often<br>Never                                               | .66 | 77 | .61 | 58 |
| Do you have a television in your own bedroom?                                               | Yes<br>No                                                                                                                                      | .92 | 96 | .81 | 91 | TV/video/DVD is available in my child's room                                                                                                                                       | Yes<br>No                                                                                        | .97 | 99 | .94 | 97 |
| How often do you watch television with your parents/care givers?                            | Never<br>Less than once a week<br>Once a week<br>2-4 days a week<br>5-6 days a week<br>Every day once a day<br>Every day, more than once a day | .64 | 41 | .49 | 37 | How often do you (one parent/spouse/ partner or both) watch television together with your child?                                                                                   | Never<br>Less than once a week<br>Once a week<br>2-4 days a week<br>5-6 days a week              | .72 | 69 | .70 | 69 |

Abbreviations: ICC, intraclass correlation coefficient

\* Percentage agreement between test retest study using the same questionnaire

† Percentage agreement between questionnaire and subsequent interview

From:

Singh AS, Vik FN, Chinapaw MJ, Uijtdewilligen L, Verloigne M, Fernandez-Alvira JM, *et al.* Test-retest reliability and construct validity of the ENERGY-child questionnaire on energy balance-related behaviours and their potential determinants: the ENERGY-project. *Int J Behav Nutr Phys Act.* 2011; 8: 136.

Singh AS, Vik FN, Chinapaw MJ, Uijtdewilligen L, Froydis NV, van Lippevelde W, *et al.* Test-retest reliability and construct validity of the ENERGY-parent questionnaire on parenting practices, energy balance-related behaviours and their potential behavioural determinants: the ENERGY-project. *BMC Res Notes.* 2012; 5: 434.
