# Supplementary material for: Agreement between parent and child report on parental practices regarding dietary, physical activity and sedentary behaviours: the ENERGY cross-sectional survey
Source: PubMed Central journal article supplement (PMC4169834; doi:10.1186/1471-2458-14-918), 2014-09-05
Supplement: 12889_2013_7052_MOESM3_ESM.pdf [file 12889_2013_7052_MOESM3_ESM.pdf]

**Supplemental table 2: Characteristics of parent-child dyads and factors associated with parents not completing a questionnaire for each participating country**

|                                 |               | Belgium      |                 | Greece       |                 | Hungary      |                 | Netherlands  |                 | Norway       |                 | Slovenia     |                 | Spain            |                 | Switzerland      |                 |           |        |           |        |           |        |           |        |           |        |           |        |           |        |           |        |
|---------------------------------|---------------|--------------|-----------------|--------------|-----------------|--------------|-----------------|--------------|-----------------|--------------|-----------------|--------------|-----------------|------------------|-----------------|------------------|-----------------|-----------|--------|-----------|--------|-----------|--------|-----------|--------|-----------|--------|-----------|--------|-----------|--------|-----------|--------|
|                                 |               | Participants | Nonres-ponders* | Participants | Nonres-ponders* | Participants | Nonres-ponders* | Participants | Nonres-ponders* | Participants | Nonres-ponders* | Participants | Nonres-ponders* | Participants     | Nonres-ponders* | Participants     | Nonres-ponders* |           |        |           |        |           |        |           |        |           |        |           |        |           |        |           |        |
| <b>Child - Parent dyads (N)</b> |               | 747          | 258             | 992          | 100             | 917          | 98              | 399          | 557             | 843          | 161             | 1010         | 171             | 957              | 64              | 560              | 43              |           |        |           |        |           |        |           |        |           |        |           |        |           |        |           |        |
| <b>Child</b>                    |               |              |                 |              |                 |              |                 |              |                 |              |                 |              |                 |                  |                 |                  |                 |           |        |           |        |           |        |           |        |           |        |           |        |           |        |           |        |
| Gender                          | Girls         | <b>54.6</b>  | <b>44.6</b>     | <b>55.3</b>  | <b>39.0</b>     | 55.7         | 48.0            | 51.1         | 49.9            | 52.9         | 46.6            | <b>53.3</b>  | <b>40.9</b>     | 51.7             | 53.1            | 48.6             | 39.5            |           |        |           |        |           |        |           |        |           |        |           |        |           |        |           |        |
|                                 | Boys          | <b>45.4</b>  | <b>55.4</b>     | <b>44.7</b>  | <b>61.0</b>     | 44.3         | 52.0            | 48.9         | 50.1            | 47.1         | 53.4            | <b>46.7</b>  | <b>59.1</b>     | 48.3             | 46.9            | 51.4             | 50.1            |           |        |           |        |           |        |           |        |           |        |           |        |           |        |           |        |
| Age (years)                     | 10 <11        | 26.0         | 23.6            | 33.4         | 29.0            | 0.7          | 0.0             | 19.1         | 9.7             | 11.7         | 9.3             | 31.2         | 26.3            | 27.4             | 21.9            | 24.1             | 18.6            |           |        |           |        |           |        |           |        |           |        |           |        |           |        |           |        |
|                                 | 11 <12        | 47.4         | 39.9            | 47.8         | 41.0            | 34.5         | 27.6            | 46.9         | 37.7            | 38.7         | 28.0            | 47.2         | 38.0            | 49.8             | 42.2            | 44.3             | 27.9            |           |        |           |        |           |        |           |        |           |        |           |        |           |        |           |        |
|                                 | 12 <13        | 25.3         | 29.8            | 18.3         | 15.0            | 54.9         | 50.0            | <b>32.3</b>  | <b>39.3</b>     | 0.0          | 47.2            | 21.2         | 29.2            | 22.2             | 29.7            | 28.0             | 41.9            |           |        |           |        |           |        |           |        |           |        |           |        |           |        |           |        |
|                                 | 13 <14        | 1.2          | 1.2             | 0.5          | 2.0             | 9.7          | 20.4            | <b>38.0</b>  | <b>5.9</b>      | 8.3          | 10.6            | 0.3          | 1.2             | 0.5              | 3.1             | 3.4              | 4.65            |           |        |           |        |           |        |           |        |           |        |           |        |           |        |           |        |
| National language at home       | No            | <b>7.2</b>   | <b>14.7</b>     | <b>8.5</b>   | <b>23.0</b>     | 2.29         | 2.0             | 5.01         | 9.5             | <b>3.7</b>   | <b>11.8</b>     | 7.0          | 11.1            | <b>2.7</b>       | <b>10.9</b>     | <b>20.5</b>      | <b>48.8</b>     |           |        |           |        |           |        |           |        |           |        |           |        |           |        |           |        |
|                                 | Yes           | <b>91.8</b>  | <b>81.0</b>     | <b>91.0</b>  | <b>65.0</b>     | 97.6         | 98.0            | 93.5         | 84.4            | <b>95.6</b>  | <b>85.7</b>     | 91.9         | 85.4            | <b>96.9</b>      | <b>85.9</b>     | <b>77.3</b>      | <b>46.5</b>     |           |        |           |        |           |        |           |        |           |        |           |        |           |        |           |        |
| Living with                     | Parents       | 88.9         | 85.7            | 79.2         | 69.0            | 77.3         | 65.3            | 87.0         | 78.5            | 87.4         | 78.3            | 80.3         | 76.0            | 86.0             | 81.3            | 81.8             | 76.7            |           |        |           |        |           |        |           |        |           |        |           |        |           |        |           |        |
|                                 | Single parent | 8.3          | 7.8             | 7.7          | 10.0            | <b>12.4</b>  | <b>24.5</b>     | 11.0         | 12.8            | <b>10.2</b>  | <b>16.2</b>     | <b>6.9</b>   | <b>12.9</b>     | 5.8              | 7.8             | 13.2             | 18.6            |           |        |           |        |           |        |           |        |           |        |           |        |           |        |           |        |
|                                 | Other adults  | 2.3          | 3.1             | 12.6         | 10.0            | 10.1         | 9.2             | <b>0.0</b>   | <b>2.7</b>      | 1.8          | 2.5             | 11.9         | 8.2             | 8.2              | 7.8             | 2.9              | 0               |           |        |           |        |           |        |           |        |           |        |           |        |           |        |           |        |
| Siblings                        | No            | 15.9         | 16.7            | 17.2         | 18.0            | 21.8         | 16.3            | 8.5          | 7.9             | <b>10.4</b>  | <b>6.2</b>      | 14.6         | 17.5            | 16.5             | 17.2            | 12.7             | 9.3             |           |        |           |        |           |        |           |        |           |        |           |        |           |        |           |        |
|                                 | Yes           | 83.5         | 79.5            | 82.4         | 71.0            | 77.9         | 81.6            | 90.0         | 85.6            | <b>89.0</b>  | <b>91.3</b>     | 84.2         | 79.0            | 83.1             | 79.7            | 84.8             | 86.1            |           |        |           |        |           |        |           |        |           |        |           |        |           |        |           |        |
| Weight status                   | Normal        | 72.7         | 72.5            | 54.2         | 58.0            | 65.1         | 64.3            | 73.2         | 67.0            | 75.9         | 75.2            | 65.2         | 52.6            | 69.2             | 56.3            | 75.7             | 62.8            |           |        |           |        |           |        |           |        |           |        |           |        |           |        |           |        |
|                                 | Overweight†   | 15.1         | 14.7            | 41.5         | 30.0            | 24.4         | 27.6            | 11.3         | 17.6            | 13.8         | 15.5            | 25.5         | 28.7            | 23.9             | 29.7            | 13.2             | 20.9            |           |        |           |        |           |        |           |        |           |        |           |        |           |        |           |        |
|                                 | Underweight‡  | 12.1         | 9.7             | 3.6          | 4.0             | 10.3         | 8.2             | 10.5         | 6.5             | 7.2          | 8.1             | 6.8          | 8.2             | 5.4              | 6.3             | 11.1             | 9.3             |           |        |           |        |           |        |           |        |           |        |           |        |           |        |           |        |
| BMI of child                    | kg/m2         | Mean 19.0    | SD 3.3          | Mean 18.3    | SD 3.1          | Mean 20.5    | SD 3.8          | Mean 19.8    | SD 3.7          | Mean 19.4    | SD 3.6          | Mean 19.9    | SD 3.7          | Mean <b>17.9</b> | SD <b>2.6</b>   | Mean <b>18.9</b> | SD <b>3.4</b>   | Mean 18.6 | SD 2.7 | Mean 18.7 | SD 2.8 | Mean 19.1 | SD 3.3 | Mean 19.5 | SD 3.6 | Mean 19.1 | SD 2.9 | Mean 19.8 | SD 3.2 | Mean 17.9 | SD 2.7 | Mean 19.1 | SD 3.2 |
| <b>Parent</b>                   |               |              |                 |              |                 |              |                 |              |                 |              |                 |              |                 |                  |                 |                  |                 |           |        |           |        |           |        |           |        |           |        |           |        |           |        |           |        |
| Parent                          | Mother        | 87.2         |                 | 81.9         |                 | 85.3         |                 | 90.7         |                 | 79.1         |                 | 78.7         |                 | 80.6             |                 | 81.6             |                 |           |        |           |        |           |        |           |        |           |        |           |        |           |        |           |        |
|                                 | Father        | 12.5         |                 | 17.9         |                 | 14.4         |                 | 9.0          |                 | 20.3         |                 | 21.0         |                 | 19.1             |                 | 18.2             |                 |           |        |           |        |           |        |           |        |           |        |           |        |           |        |           |        |
| Education                       | < 14 years    | 21.8         |                 | 58.2         |                 | 51.7         |                 | 30.3         |                 | 35.4         |                 | 51.5         |                 | 26.8             |                 | 69.8             |                 |           |        |           |        |           |        |           |        |           |        |           |        |           |        |           |        |
|                                 | ≥ 14 years    | 77.1         |                 | 40.3         |                 | 47.8         |                 | 68.9         |                 | 63.7         |                 | 47.4         |                 | 72.4             |                 | 28.9             |                 |           |        |           |        |           |        |           |        |           |        |           |        |           |        |           |        |
| Age of parent                   | years         | Mean 40.9    | SD 4.6          | Mean 41.5    | SD 5.9          | Mean 39.4    | SD 5.1          | Mean 42.4    | SD 4.6          | Mean 42.0    | SD 5.0          | Mean 40.6    | SD 4.9          | Mean 42.6        | SD 4.5          | Mean 42.4        | SD 5.7          |           |        |           |        |           |        |           |        |           |        |           |        |           |        |           |        |
| BMI of parent                   | kg/m2         | Mean 24.2    | SD 4.4          | Mean 25.2    | SD 4.6          | Mean 24.7    | SD 4.6          | Mean 24.8    | SD 4.9          | Mean 24.6    | SD 3.8          | Mean 24.7    | SD 4.2          | Mean 23.9        | SD 3.3          | Mean 23.6        | SD 4.0          |           |        |           |        |           |        |           |        |           |        |           |        |           |        |           |        |

\* Coefficient of multilevel (school) logistic regression analyses with response as outcome variable

† Cole TJ, Bellizzi MC, Flegal KM, Dietz WH. Establishing a standard definition for child overweight and obesity worldwide: international survey. *Bmj.* 2000; 320: 1240-3.

‡ Cole TJ, Flegal KM, Nicholls D, Jackson AA. Body mass index cut offs to define thinness in children and adolescents: international survey. *Bmj.* 2007; 335: 194.

Percentages do not add up to 100% due to missing values. In bold statistically significant associated with non-response in multilevel (school) model adjusted for child characteristics listed in the table and including BMI as a continuous variable
