# Supplementary material for: Agreement between parent and child report on parental practices regarding dietary, physical activity and sedentary behaviours: the ENERGY cross-sectional survey
Source: PubMed Central journal article supplement (PMC4169834; doi:10.1186/1471-2458-14-918), 2014-09-05
Supplement: 12889_2013_7052_MOESM4_ESM.pdf [file 12889_2013_7052_MOESM4_ESM.pdf]

**Supplemental table 3: Percentages of reported parental practices by the child and by the parent, overall and by country**

| Parental Practices                                                                                                                                                                                                                                                               | Values                          | Total |    | Belgium |    | Greece |    | Hungary |    | Netherlands |    | Norway |    | Slovenia |    | Spain |    | Switzerland |    |
|----------------------------------------------------------------------------------------------------------------------------------------------------------------------------------------------------------------------------------------------------------------------------------|---------------------------------|-------|----|---------|----|--------|----|---------|----|-------------|----|--------|----|----------|----|-------|----|-------------|----|
|                                                                                                                                                                                                                                                                                  |                                 | C     | P  | C       | P  | C      | P  | C       | P  | C           | P  | C      | P  | C        | P  | C     | P  | C           | P  |
| <i>Soft drink consumption</i>                                                                                                                                                                                                                                                    |                                 |       |    |         |    |        |    |         |    |             |    |        |    |          |    |       |    |             |    |
| "If I ask my parents/ care givers for a fizzy drink of fruit squash, I get one" / "If my child asks for soft drinks, I will give it to him/her"                                                                                                                                  | Always or often*                | 27    | 20 | 39      | 29 | 21     | 9  | 50      | 29 | 44          | 29 | 10     | 12 | 27       | 28 | 17    | 12 | 19          | 16 |
| "I am allowed to take fizzy drinks or fruit squash whenever I want" / "My child is allowed to take soft drinks whenever (s)he wants"                                                                                                                                             | Always or often*                | 25    | 16 | 32      | 23 | 14     | 6  | 43      | 24 | 34          | 19 | 12     | 7  | 33       | 28 | 12    | 9  | 29          | 12 |
| "Are there usually fizzy drinks or fruit squash at your home?" / "There are soft drinks available at home for my child"                                                                                                                                                          | Always or often*                | 43    | 34 | 65      | 50 | 27     | 16 | 56      | 37 | 78          | 53 | 42     | 38 | 27       | 31 | 40    | 40 | 34          | 23 |
| <i>Fruit juice consumption</i>                                                                                                                                                                                                                                                   |                                 |       |    |         |    |        |    |         |    |             |    |        |    |          |    |       |    |             |    |
| "I am allowed to take fruit juices whenever I want" / "My child is allowed to take fruit juices whenever (s)he wants"                                                                                                                                                            | Always or often*                | 62    | 54 | 70      | 51 | 66     | 65 | 58      | 65 | 67          | 37 | 54     | 37 | 66       | 66 | 58    | 57 | 60          | 29 |
| "Are there usually fruit juices in your home?" / "There are fruit juices available at home for my child"                                                                                                                                                                         | Always or often*                | 65    | 65 | 67      | 75 | 73     | 81 | 58      | 58 | 67          | 70 | 56     | 55 | 62       | 57 | 74    | 75 | 55          | 48 |
| <i>Having breakfast</i>                                                                                                                                                                                                                                                          |                                 |       |    |         |    |        |    |         |    |             |    |        |    |          |    |       |    |             |    |
| "My parents/ care givers encourage me to have breakfast" / "I encourage my child to have breakfast"                                                                                                                                                                              | I fully agree†                  | 49    | 83 | 45      | 84 | 45     | 82 | 68      | 86 | 30          | 86 | 37     | 86 | 63       | 74 | 51    | 90 | 29          | 76 |
| Are there usually breakfast products (e.g. milk, cereal, bread) at your home?" / "There are breakfast products (e.g. milk, cereal, bread) available at home for my child"                                                                                                        | Always or often*                | 92    | 98 | 94      | 98 | 92     | 97 | 92      | 98 | 91          | 99 | 94     | 99 | 88       | 98 | 94    | 99 | 90          | 98 |
| "How often do you eat breakfast with your parents/care givers?" / "How often do you and/or your spouse/partner have breakfast together with your child?"                                                                                                                         | Never or less than once a week‡ | 30    | 27 | 20      | 20 | 47     | 54 | 40      | 35 | 13          | 8  | 20     | 9  | 32       | 31 | 30    | 24 | 21          | 17 |
| <i>Physical activity/ sports</i>                                                                                                                                                                                                                                                 |                                 |       |    |         |    |        |    |         |    |             |    |        |    |          |    |       |    |             |    |
| "My parents/ care givers encourage me to be physically active/ do sports" / "I encourage my child to take part in physical activity/sports"                                                                                                                                      | I fully agree†                  | 63    | 58 | 75      | 57 | 63     | 51 | 75      | 63 | 40          | 58 | 54     | 54 | 83       | 62 | 67    | 61 | 41          | 51 |
| "How often do you take part in physical activity/ do sports with your parents/care givers?" / "How often do you and/or your spouse/partner participate in physical activity/ sports together with your child (e.g. Play games outside, ride bikes, walk, play sports together)?" | Never or less than once a week‡ | 69    | 71 | 75      | 79 | 74     | 80 | 64      | 77 | 70          | 59 | 80     | 71 | 56       | 62 | 58    | 65 | 87          | 72 |
| <i>Watching TV</i>                                                                                                                                                                                                                                                               |                                 |       |    |         |    |        |    |         |    |             |    |        |    |          |    |       |    |             |    |
| "My parents/ care givers allow me to watch television whenever I want" / "My child is allowed to watch TV/video/dvd whenever (s)he wants"                                                                                                                                        | I fully agree†                  | 31    | 20 | 41      | 25 | 24     | 21 | 46      | 26 | 39          | 19 | 24     | 33 | 36       | 14 | 22    | 10 | 11          | 6  |
| "If I ask my parents/ care givers to watch television, I can do so" / "If my child asks if (s)he is allowed to watch TV/video/dvd, I will allow it"                                                                                                                              | Always or often*                | 50    | 43 | 53      | 44 | 52     | 46 | 74      | 66 | 45          | 47 | 55     | 55 | 50       | 36 | 30    | 21 | 27          | 23 |
| "Do you have a television in your own bedroom?" / "TV/video/DVD is available in my child's room?"                                                                                                                                                                                | Yes§                            | 35    | 32 | 25      | 24 | 42     | 40 | 65      | 61 | 39          | 33 | 39     | 37 | 24       | 22 | 28    | 20 | 15          | 14 |

|                                                                                                    |                        |    |    |    |    |    |    |    |    |    |    |    |    |    |    |    |    |    |    |
|----------------------------------------------------------------------------------------------------|------------------------|----|----|----|----|----|----|----|----|----|----|----|----|----|----|----|----|----|----|
| "How often do you watch television with your parents/care givers?"/                                | Never or               | 32 | 33 | 18 | 29 | 34 | 35 | 29 | 34 | 30 | 23 | 32 | 18 | 34 | 44 | 29 | 24 | 53 | 60 |
| "How often do you (one parent/spouse/ partner or both) watch television together with your child?" | less than once a week‡ |    |    |    |    |    |    |    |    |    |    |    |    |    |    |    |    |    |    |

Abbreviations: C, Child; P, Parent

\*versus: Sometimes, not often, never

†versus: I agree a bit, neither disagree nor agree, I disagree a bit, I fully disagree

‡ versus: Once a week, 2-4 days a week, 5-6 days a week, every day

§versus: No

Percentages are presented and cells of values are coloured in light grey if the proportion (reported by the child) differed by more than 15% of the average proportion (reported by the child) over all countries in either direction
